# Supplementary material
Source: PubMed Central journal article supplement (PMC6565452)
Supplement: NIHMS1028785-supplement-1.pdf [file NIHMS1028785-supplement-1.pdf]

Supplementary Table: Epi4K Consortium collaborators

| Author              | Affiliation                                                                                                                                                                                                                                     |
|---------------------|-------------------------------------------------------------------------------------------------------------------------------------------------------------------------------------------------------------------------------------------------|
| Bassel Abou-Khalil  | Department of Neurology, Vanderbilt University Medical Center, Nashville, Tennessee 37232 USA.                                                                                                                                                  |
| Zaid Afawi          | Sackler School of Medicine, Tel Aviv University, Ramat Aviv, Israel.                                                                                                                                                                            |
| Andrew S. Allen     | Center for Human Genome Variation, Duke University School of Medicine, Durham, North Carolina 27708, USA.                                                                                                                                       |
| Jocelyn F. Bautista | Department of Neurology, Cleveland Clinic Lerner College of Medicine & Epilepsy, Center of the Cleveland Clinic Neurological Institute, Cleveland, Ohio 44195 USA.                                                                              |
| Susannah T. Bellows | Epilepsy Research Centre, Department of Medicine, University of Melbourne (Austin Health), Heidelberg, Victoria 3084, Australia.                                                                                                                |
| Samuel F. Berkovic  | Epilepsy Research Centre, Department of Medicine, University of Melbourne (Austin Health), Heidelberg, Victoria 3084, Australia.                                                                                                                |
| Judith Bluvstein    | NYU Comprehensive Epilepsy Center, New York University, Department of Neurology, NYU School of Medicine, New York, New York 10016, USA.                                                                                                         |
| Rosemary Burgess    | Epilepsy Research Centre, Department of Medicine, University of Melbourne (Austin Health), Heidelberg, Victoria 3084, Australia.                                                                                                                |
| Gregory D. Cascino  | Division of Epilepsy, Mayo Clinic, Rochester, Minnesota 55905 USA.                                                                                                                                                                              |
| Patrick Cossette    | Centre of Excellence in Neuromics and CHUM Research Center, Université de Montréal, CHUM-Hôpital, Notre-Dame Montréal, Quebec H2L 4M1, Canada.                                                                                                  |
| Sabrina Cristofaro  | NYU Comprehensive Epilepsy Center, New York University, Department of Neurology, NYU School of Medicine, New York, New York 10016, USA.                                                                                                         |
| Douglas E. Crompton | Epilepsy Research Centre, Department of Medicine, University of Melbourne (Austin Health), Heidelberg, Victoria 3084, Australia.                                                                                                                |
| Norman Delanty      | Department of Neurology, Beaumont Hospital, and FutureNeuro Research Centre, Royal College of Surgeons in Ireland, Dublin 9, Ireland.                                                                                                           |
| Orrin Devinsky      | NYU Comprehensive Epilepsy Center, New York University, Department of Neurology, NYU School of Medicine, New York, New York 10016, USA.                                                                                                         |
| Dennis Dlugos       | Department of Neurology and Pediatrics, The Children's Hospital of Philadelphia, Perelman School of Medicine at the University of Pennsylvania, Philadelphia, Pennsylvania 19104, USA.                                                          |
| Colin A. Ellis      | Epilepsy Research Centre, Department of Medicine, University of Melbourne (Austin Health), Heidelberg, Victoria 3084, Australia.; and 11. Department of Neurology, Perelman School of Medicine at the University of Pennsylvania, Philadelphia, |

|                        |                                                                                                                                                                                                 |
|------------------------|-------------------------------------------------------------------------------------------------------------------------------------------------------------------------------------------------|
|                        | Pennsylvania 19104, USA.                                                                                                                                                                        |
| Michael P. Epstein     | Department of Human Genetics, Emory University School of Medicine, Atlanta, Georgia, 30322, USA.                                                                                                |
| Nathan B. Fountain     | FE Dreifuss Comprehensive Epilepsy Program, University of Virginia, Charlottesville, Virginia 22908 USA.                                                                                        |
| Catharine Freyer       | Department of Neurology, University of California, San Francisco, San Francisco, California 94143 USA.                                                                                          |
| Eric B. Geller         | Institute of Neurology and Neurosurgery at Saint Barnabas, Saint Barnabas Medical Center, Livingston NJ, USA.                                                                                   |
| Tracy Glauser          | Division of Neurology, Cincinnati Children's Hospital Medical Center, Cincinnati, Ohio 45229 USA.                                                                                               |
| Simon Glynn            | Department of Neurology and Neuroscience Graduate Program, University of Michigan Medical Center, Ann Arbor, and Ann Arbor Veterans Administration Healthcare System, Ann Arbor, Michigan, USA. |
| Hadassa Goldberg-Stern | Epilepsy Unit, Schneider Children's Medical Center of Israel, Petach Tikvah, Israel.                                                                                                            |
| David B. Goldstein     | Institute for Genomic Medicine, Columbia University Medical Center, New York, New York 10032 USA.                                                                                               |
| Micheline Gravel       | Centre of Excellence in Neuromics and CHUM Research Center, Université de Montréal, CHUM-Hôpital, Notre-Dame Montréal, Quebec H2L 4M1, Canada.                                                  |
| Kevin Haas             | Department of Neurology, Vanderbilt University Medical Center, Nashville, Tennessee 37232 USA.                                                                                                  |
| Sheryl Haut            | Department of Neurology, Montefiore Einstein, 111 East 210th St, Bronx, NY 1046.                                                                                                                |
| Erin L. Heinzen        | Institute for Genomic Medicine, Columbia University Medical Center, New York, New York 10032 USA.                                                                                               |
| Olivia J. Henry        | Epilepsy Research Centre, Department of Medicine, University of Melbourne (Austin Health), Heidelberg, Victoria 3084, Australia.                                                                |
| Heidi E. Kirsch        | Department of Neurology, University of California, San Francisco, San Francisco, California 94143 USA.                                                                                          |
| Sara Kivity            | Epilepsy Unit, Schneider Children's Medical Center of Israel, Petach Tikvah, Israel.                                                                                                            |
| Robert Knowlton        | Department of Neurology, University of California, San Francisco, San Francisco, California 94143 USA.                                                                                          |
| Amos D. Korczyn        | Sackler School of Medicine, Tel Aviv University, Ramat Aviv, Israel.                                                                                                                            |
| Eric Kossoff           | Department of Neurology, Johns Hopkins Hospital, Baltimore, Maryland 21287 USA.                                                                                                                 |
| Ruben Kuzniecky        | Department of Neurology, Zucker Hofstra School of Medicine, Lenox-Hill Hospital, New York, NY 10075.                                                                                            |
| Rebecca Loeb           | G. H. Sergievsky Center, Columbia University, New York, NY 10032, USA.                                                                                                                          |
| Daniel H. Lowenstein   | Department of Neurology, University of California, San Francisco, San Francisco, California 94143 USA.                                                                                          |
| Anthony G. Marson      | Department of Molecular and Clinical Pharmacology, University of Liverpool, Clinical Sciences Centre, Lower Lane,                                                                               |

|                       |                                                                                                                                                                                                                                                                                                                   |
|-----------------------|-------------------------------------------------------------------------------------------------------------------------------------------------------------------------------------------------------------------------------------------------------------------------------------------------------------------|
|                       | Liverpool L9 7LJ, UK.                                                                                                                                                                                                                                                                                             |
| Mark McCormack        | Molecular & Cellular Therapeutics, Royal College of Surgeons in Ireland, Dublin 2, Ireland; and Department of Genetics, Universitair Medisch Centrum Utrecht, Utrecht, the Netherlands.                                                                                                                           |
| Kevin McKenna         | Department of Neurology, University of California, San Francisco, San Francisco, California 94143 USA.                                                                                                                                                                                                            |
| Heather C. Mefford    | Department of Pediatrics, Division of Genetic Medicine, University of Washington, Seattle, Washington 98195, USA.                                                                                                                                                                                                 |
| Paul Motika           | Comprehensive Epilepsy Center, Oregon Health and Science University, Portland, OR 97239 USA.                                                                                                                                                                                                                      |
| Saul A. Mullen        | Epilepsy Research Centre, Department of Medicine, University of Melbourne (Austin Health), Heidelberg, Victoria 3084, Australia.                                                                                                                                                                                  |
| Terence J O'Brien     | Departments of Medicine and Neurology, The Royal Melbourne Hospital, Parkville, Victoria 3146, Australia.                                                                                                                                                                                                         |
| Ruth Ottman           | G. H. Sergievsky Center, Columbia University, New York, NY 10032, USA; and Department of Neurology, Columbia University, New York, NY 10032, USA; and Department of Epidemiology, Columbia University; and Division of Translational Epidemiology, New York State Psychiatric Institute, New York, NY 10032, USA. |
| Juliann Paolicchi     | Northeast Regional Epilepsy Group, New York, NY 10017; and Rutgers University Medical Center, Newark, NJ 07103; and Seton Hall University Medical Center, Nutley, NJ 07110, USA.                                                                                                                                  |
| Jack M. Parent        | Department of Neurology and Neuroscience Graduate Program, University of Michigan Medical Center, Ann Arbor, and Ann Arbor Veterans Administration Healthcare System, Ann Arbor, Michigan, USA.                                                                                                                   |
| Sarah Paterson        | Department of Paediatrics, School of Medicine and Health Sciences, University of Otago, Wellington, New Zealand.                                                                                                                                                                                                  |
| Slavé Petrovski       | Epilepsy Research Centre, Department of Medicine, University of Melbourne (Austin Health), Heidelberg, Victoria 3084, Australia.                                                                                                                                                                                  |
| William Owen Pickrell | Wales Epilepsy Research Network, Swansea University Medical School, Swansea University, Wales, UK.                                                                                                                                                                                                                |
| Annapurna Poduri      | Division of Epilepsy and Clinical Neurophysiology, Department of Neurology, Boston Children's Hospital, Boston, Massachusetts 02115, USA.                                                                                                                                                                         |
| Mark I. Rees          | Wales Epilepsy Research Network, Swansea University Medical School, Swansea University, Wales, UK.                                                                                                                                                                                                                |
| Lynette G. Sadleir    | Department of Paediatrics and Child Health, University of Otago, Wellington, New Zealand.                                                                                                                                                                                                                         |
| Ingrid E. Scheffer    | Epilepsy Research Centre, Department of Medicine, University of Melbourne (Austin Health), Heidelberg, Victoria 3084, Australia; and Florey Institute and Department of Paediatrics, Royal Children's Hospital, Melbourne, Victoria, Australia.                                                                   |
| Jerry Shih            | Comprehensive Epilepsy Center, Department of Neurosciences, University of California, San Diego School of Medicine, San                                                                                                                                                                                           |

|                     |                                                                                                                                                                                                                                                                                                                                            |
|---------------------|--------------------------------------------------------------------------------------------------------------------------------------------------------------------------------------------------------------------------------------------------------------------------------------------------------------------------------------------|
|                     | Diego, California, USA.                                                                                                                                                                                                                                                                                                                    |
| Rani Singh          | Carolinas Health Care System, USA.                                                                                                                                                                                                                                                                                                         |
| Joseph Sirven       | Department of Neurology, Mayo Clinic, Scottsdale, Arizona 85259 USA.                                                                                                                                                                                                                                                                       |
| Michael C. Smith    | Rush University Medical Center, Rush Epilepsy Center, Chicago, IL.                                                                                                                                                                                                                                                                         |
| Phil E.M. Smith     | Department of Neurology, University Hospital of Wales, Heath Park, Cardiff, Wales, CF14 4XW, UK.                                                                                                                                                                                                                                           |
| Liu Lin Thio        | Department of Neurology, Washington University School of Medicine, St. Louis, Missouri 63110 USA.                                                                                                                                                                                                                                          |
| Rhys H. Thomas      | Epilepsy Research Centre, Department of Medicine, University of Melbourne (Austin Health), Heidelberg, Victoria 3084, Australia.; and Wales Epilepsy Research Network, Swansea University Medical School, Swansea University, Wales, UK; and MRC Centre for Neuropsychiatric Genetics & Genomics, Cardiff University, Wales, CF24 4HQ, UK. |
| Anu Venkat          | Department of Pediatrics, Children's Hospital at Saint Peter's University Hospital, Rutgers Robert Wood Johnson Medical School, New Brunswick, NJ, USA.                                                                                                                                                                                    |
| Eileen Vining       | Department of Neurology, Johns Hopkins Hospital, Baltimore, Maryland 21287 USA.                                                                                                                                                                                                                                                            |
| Gretchen Von Allmen | Division of Child & Adolescent Neurology, Departments of Pediatrics, University of Texas Medical School, Houston, Texas 77030 USA.                                                                                                                                                                                                         |
| Judith Weisenberg   | Department of Neurology, Washington University School of Medicine, St. Louis, Missouri 63110 USA.                                                                                                                                                                                                                                          |
| Peter Widdess-Walsh | Department of Neurology, Beaumont Hospital, Dublin, Ireland.                                                                                                                                                                                                                                                                               |
| Melodie R. Winawer  | G. H. Sergievsky Center, Columbia University, New York, NY 10032, USA; and Department of Neurology, Columbia University, New York, NY 10032, USA.                                                                                                                                                                                          |
